# Supplementary material for: Smoking and Physical Activity Trajectories from Childhood to Midlife
Source: MDPI journal article supplement (doi:10.3390/ijerph16060974), 2019-03-18

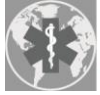

## Supplement 1

**Table 1.** Young Finns study questionnaire. Questions related to physical activity and smoking, and coding between the years 1980–2011.

### Years 1980–1989

|                                                                                             | Coding |
|---------------------------------------------------------------------------------------------|--------|
| How often do you engage in leisure-time physical activity at least half an hour per time?   |        |
| Not at all                                                                                  | 1      |
| Less than once a month                                                                      | 1      |
| Once a month                                                                                | 1      |
| 2–3 times a month                                                                           | 1      |
| Once a week                                                                                 | 2      |
| 2–6 times a week                                                                            | 2      |
| Every day                                                                                   | 3      |
| How much are you breath-taking and sweating when you engage in physical activity and sport? |        |
| Not at all                                                                                  | 1      |
| Moderately                                                                                  | 2      |
| A lot of                                                                                    | 3      |
| How many times a week do you usually engage in training sessions organized by a sport club? |        |
| Not at all                                                                                  | 1      |
| Occasionally                                                                                | 1      |
| Less than once a month                                                                      | 1      |
| Once a month or more                                                                        | 2      |
| Once a week                                                                                 | 2      |
| Several hours and times a week                                                              | 3      |
| Do you participate in sports competitions?                                                  |        |
| Not at all                                                                                  | 1      |
| Sports club level                                                                           | 2      |
| Regional level                                                                              | 2      |
| National level                                                                              | 2      |
| What do you usually do in your leisure time?                                                |        |
| I am usually indoors and read or do other sedentary activities                              | 1      |
| I spend my time indoors and outdoors                                                        | 1      |
| I usually walk or spend my time with friends                                                | 2      |
| I am usually outdoors and exercise quite a lot                                              | 3      |
| Count                                                                                       | 5-14   |

### Years 1992-2011

|                                                        | Coding |
|--------------------------------------------------------|--------|
| How often do you engage in rigorous physical activity? |        |
| Not at all                                             | 1      |
| Once a month or more                                   | 1      |
| Once a week                                            | 1      |

|                                                                                                       |      |
|-------------------------------------------------------------------------------------------------------|------|
| 2–3 times a week                                                                                      | 2    |
| 4–6 times a week                                                                                      | 2    |
| Every day                                                                                             | 3    |
| How much breathlessness and sweating do you experience when you engage in physical activity and sport |      |
| Not at all                                                                                            | 1    |
| Moderate amount                                                                                       | 2    |
| A lot                                                                                                 | 3    |
| How many hours per week do you engage in rigorous physical activity?                                  |      |
| Not at all                                                                                            | 1    |
| 30 minutes                                                                                            | 1    |
| 1 hour                                                                                                | 2    |
| 2–3 hours                                                                                             | 2    |
| 4–6 hours                                                                                             | 3    |
| 7 hours or more                                                                                       |      |
| How much time do you usually spend in a physical activity session?                                    |      |
| Less than 20 minutes                                                                                  | 2    |
| 20–40 minutes                                                                                         | 2    |
| 40–60 minutes                                                                                         | 3    |
| >60 minutes                                                                                           |      |
| Do you participate in organized physical activity?                                                    |      |
| Not at all                                                                                            | 1    |
| Occasionally                                                                                          | 1    |
| Regularly, about once per week                                                                        | 2    |
| Several hours and times per week                                                                      | 3    |
| Count                                                                                                 | 5-15 |

Years 1980–2011

|                              |       |
|------------------------------|-------|
|                              |       |
| Daily smoking (factory-made) | Count |
| Daily smoking (self-made)    | Count |
| Daily smoking (pipeful)      | Count |
| Daily smoking (cigar)        | Count |
|                              | Sum   |

**Table S2.** The model fit and class sizes from the latent profile analyses of physical activity (PA) and smoking among males ( $n = 1607$ ) and among females ( $n = 1748$ ).

| Number of classes | AIC          | BIC          | ABIC         | VLMR             | LMR              | BLRT             | Class sizes <sup>a</sup>                | AvePP                               |
|-------------------|--------------|--------------|--------------|------------------|------------------|------------------|-----------------------------------------|-------------------------------------|
| PA                |              |              |              |                  |                  |                  |                                         |                                     |
| Men               |              |              |              |                  |                  |                  |                                         |                                     |
| 1                 | 31213        | 31364        | 31275        | -                | -                | -                | -                                       | -                                   |
| 2                 | 29762        | 29994        | 29857        | <0.001           | <0.001           | <0.001           | 73.7%, 26.3%                            | 0.95, 0.91                          |
| 3                 | 29443        | 29756        | 29571        | 0.009            | 0.010            | <0.001           | 43.4%, 39.8%, 16.8%                     | 0.84, 0.79, 0.89                    |
| <b>4</b>          | <b>29238</b> | <b>29631</b> | <b>29399</b> | <b>&lt;0.001</b> | <b>&lt;0.001</b> | <b>&lt;0.001</b> | <b>41.1%, 30.7%, 15.8%, 12.5%</b>       | <b>0.83, 0.78, 0.74, 0.87</b>       |
| 5                 | 29185        | 29659        | 29380        | 0.300            | 0.305            | <0.001           | 32.8%, 23.5%, 16.5%, 15.6%, 11.5%       | 0.67, 0.77, 0.75, 0.74, 0.87        |
| 6                 | 29128        | 29682        | 29355        | 0.476            | 0.479            | <0.001           | 31.5%, 17.1%, 16.5%, 15.4%, 10.2%, 9.4% | 0.66, 0.73, 0.68, 0.72, 0.83, 0.76  |
| Women             |              |              |              |                  |                  |                  |                                         |                                     |
| 1                 | 34265        | 34418        | 34329        | -                | -                | -                | -                                       | -                                   |
| 2                 | 33147        | 33382        | 33245        | <0.001           | <0.001           | <0.001           | 84.1%, 15.9%                            | 0.97, 0.89                          |
| 3                 | 32780        | 33097        | 32913        | <0.001           | <0.001           | <0.001           | 57.4%, 30.8%, 11.8%                     | 0.83, 0.81, 0.90                    |
| 4                 | 32660        | 33059        | 32827        | 0.689            | 0.690            | <0.001           | 49.5%, 33.8%, 12.5%, 4.2%               | 0.80, 0.80, 0.77, 0.83              |
| <b>5</b>          | <b>32531</b> | <b>33012</b> | <b>32732</b> | <b>0.202</b>     | <b>0.203</b>     | <b>&lt;0.001</b> | <b>52.5%, 17.0%, 14.9%, 12.3%, 3.4%</b> | <b>0.78, 0.79, 0.75, 0.78, 0.85</b> |
| 6                 | 32477        | 33040        | 32713        | 0.746            | 0.747            | <0.001           | 39.9%, 17.3%, 16.6%, 12.4%, 10.3%, 3.4% | 0.68, 0.76, 0.68, 0.72, 0.75, 85.4  |
| Smoking           |              |              |              |                  |                  |                  |                                         |                                     |
| Men               |              |              |              |                  |                  |                  |                                         |                                     |
| 1                 | 18092        | 18188        | 18131        | -                | -                | -                | -                                       | -                                   |
| 2                 | 16634        | 16768        | 16689        | <0.001           | <0.001           | <0.001           | 50.3%, 49.7%                            | 0.93, 0.97                          |
| 3                 | 16293        | 16465        | 16364        | <0.001           | <0.001           | <0.001           | 44.5%, 33.2%, 22.3%                     | 0.91, 0.89, 0.82                    |
| 4                 | 16215        | 16425        | 16301        | 0.063            | 0.067            | <0.001           | 44.4%, 28.3%, 18.4%, 8.9%               | 0.94, 0.78, 0.79, 0.86              |
| <b>5</b>          | <b>16191</b> | <b>16438</b> | <b>16292</b> | <b>0.048</b>     | <b>0.051</b>     | <b>&lt;0.001</b> | <b>44.6%, 25.3%, 17.3%, 8.8%, 4.0%</b>  | <b>0.91, 0.76, 0.83, 0.82, 0.72</b> |
| 6                 | 16137        | 16422        | 16254        | 0.092            | 0.095            | <0.001           | 44.8%, 15.8%, 13.7%, 10.0%, 9.9%, 5.7%  | 0.91, 0.64, 0.64, 0.67, 0.70, 0.79  |
| Women             |              |              |              |                  |                  |                  |                                         |                                     |

|          |              |              |              |              |              |                  |                                        |                                     |
|----------|--------------|--------------|--------------|--------------|--------------|------------------|----------------------------------------|-------------------------------------|
| 1        | 17208        | 17306        | 17249        | -            | -            | -                |                                        | -                                   |
| 2        | 15332        | 15469        | 15389        | <0.001       | <0.001       | <0.001           | 62.5%, 37.5%                           | 0.96, 0.96                          |
| 3        | 15043        | 15218        | 15116        | 0.040        | 0.050        | <0.001           | 58.8%, 25.3%, 15.9%                    | 0.95, 0.84, 0.87                    |
| 4        | 14950        | 15163        | 15039        | 0.285        | 0.289        | <0.001           | 56.2%, 18.4%, 16.7%, 8.7%              | 0.94, 0.78, 0.79, 0.86              |
| <b>5</b> | <b>14903</b> | <b>15154</b> | <b>15008</b> | <b>0.012</b> | <b>0.013</b> | <b>&lt;0.001</b> | <b>56.4%, 16.7%, 16.0%, 9.2%, 1.8%</b> | <b>0.94, 0.76, 0.78, 0.81, 0.91</b> |
| 6        | 14897        | 15187        | 15019        | 0.111        | 0.115        | 0.050            | 55.9%, 15.8%, 12.9%, 9.1%, 4.4%, 1.8%  | 0.94, 0.75, 0.74, 0.61, 0.92        |

<sup>a</sup> Final class counts and proportions for the latent class patterns based on estimated posterior probabilities.

AIC, Akaike's information criterion; BIC, Bayesian information criterion; ABIC, sample-size adjusted Bayesian information criterion; VLMR, Vuong-Lo-Mendell-Rubin likelihood ratio test; LMR, Lo-Mendell-Rubin adjusted LRT test; BLRT, Parametric bootstrapped likelihood ratio test.

AvePP, average posterior probabilities for most likely latent class membership

Supplement S3. Convergent validity of smoking trajectories.

Convergent validity of the smoking trajectories was visually inspected. For that purpose, participants were classified based on their most likely latent class membership. Besides of the number of daily smoked cigarettes, participants were asked to report their current smoking status. According to the self-reported smoking status, participants were classified to 1 = non-smokers, 2 = occasional smokers and 3 = regular smokers (smokes at least once a day) at each age point. The proportion of the non-smokers and the regular smokers over ages in males are presented in Figure S1 and in females in Figure S2. Among males, the proportion of the non-smokers was constantly highest within the persistently non-smokers group (constantly over 80%). Similarly, the proportion of the regular smokers was constantly highest within the persistently heavy smokers group. Within the ex-smokers group the proportion of the regular smokers was highest at ages of 18 and 21 (over 70%), and proportion of the non-smokers was over 70% from the age of 27 years.

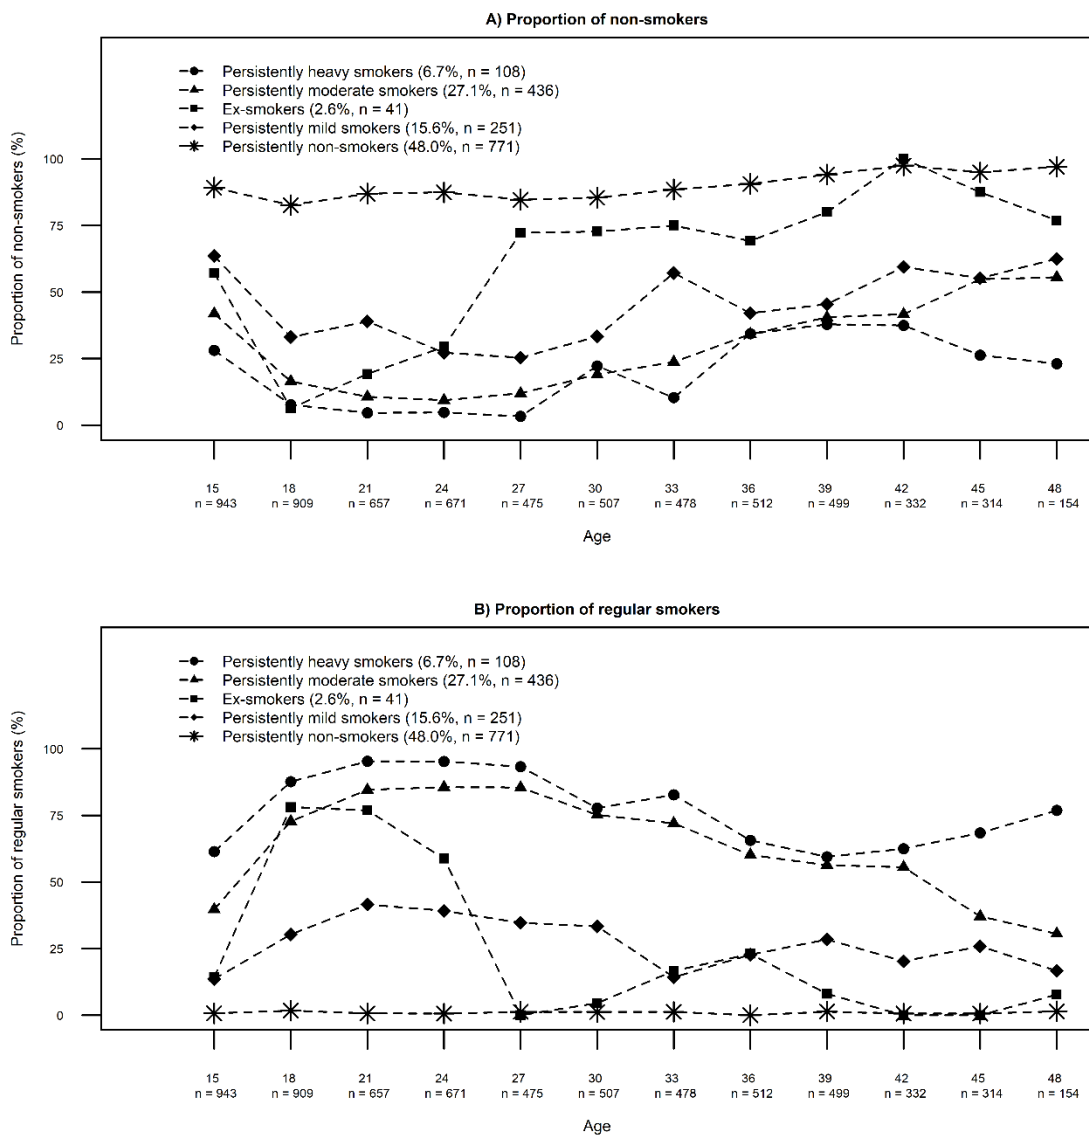

Figure S1. The proportion of the non-smokers (A) and the regular smokers (B) over ages among males.

Among females, the proportion of non-smokers was constantly highest within the persistently non-smokers group (constantly over 80%). The proportion of the regular smokers was constantly

higher within the persistently moderate smokers group compared to the persistently mild, light and non-smokers group. The proportion of regular smokers within the marginal group of decreasing smokers seemed to fluctuate.

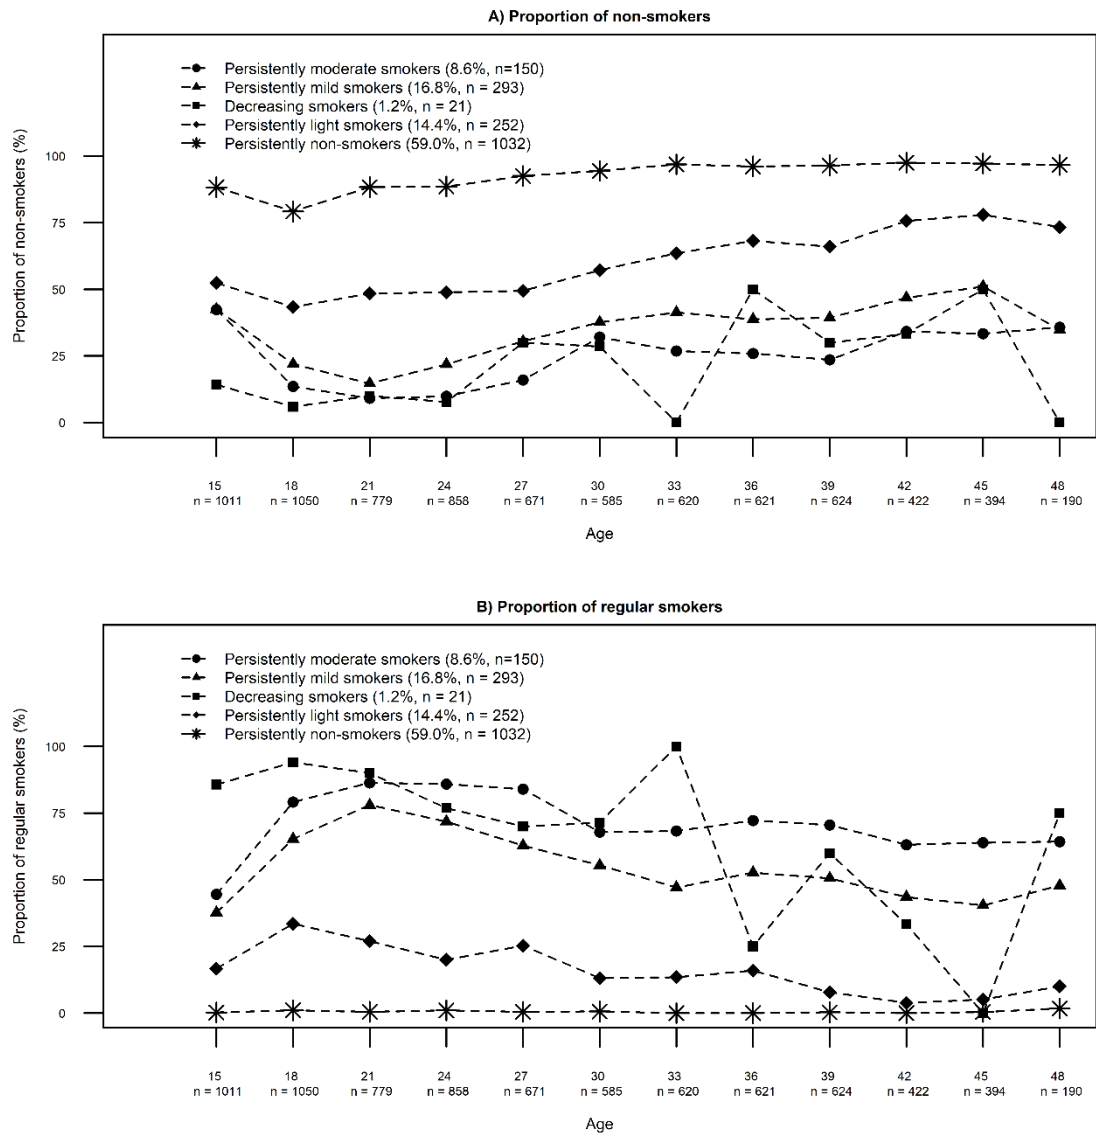

**Figure S2.** The proportion of the non-smokers (A) and the regular smokers (B) over ages among females.

Supplement 4. Flow chart of the study.

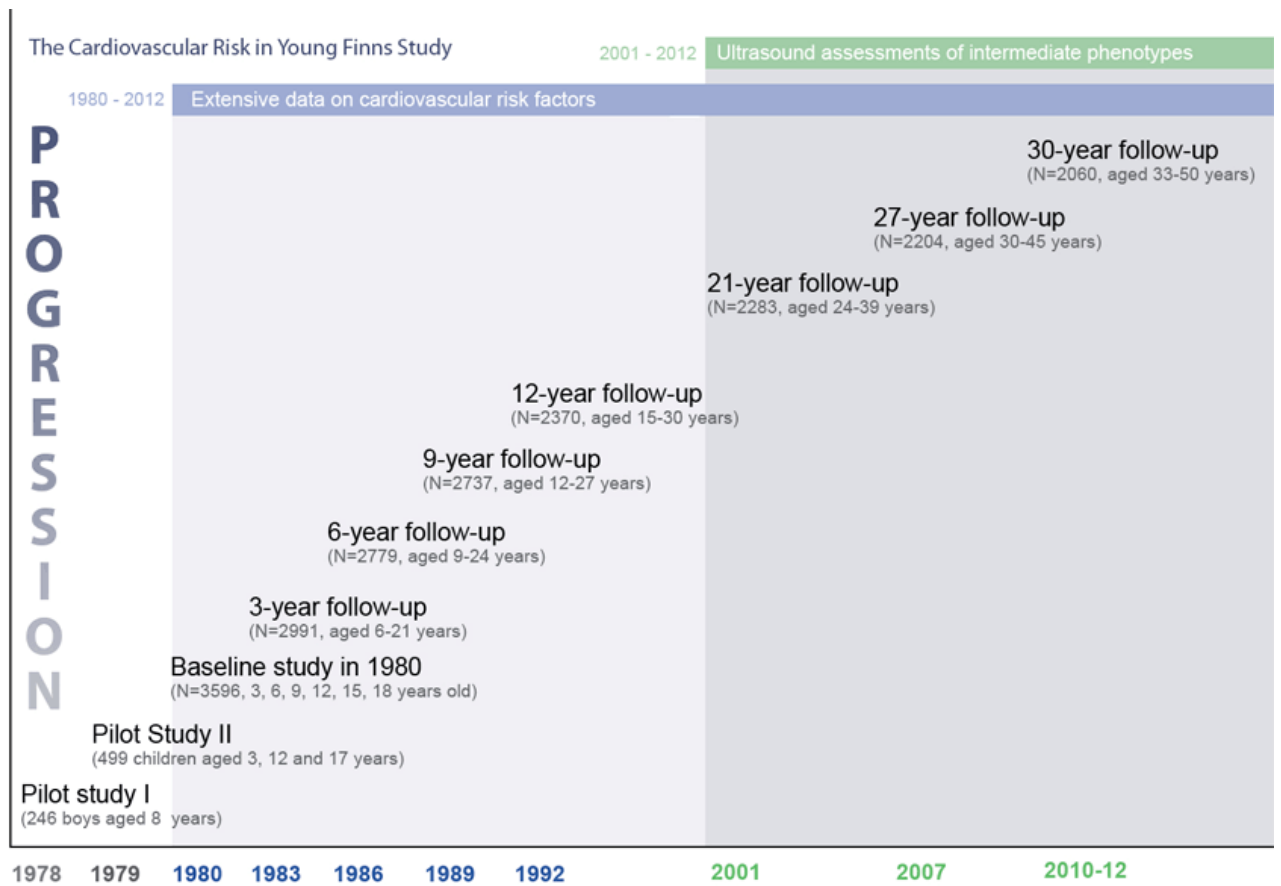

Supplement: s1 [file s1]
